# Supplementary material
Source: HighWire-hosted journal article supplement (https://openres.ersjournals.com/highwire/filestream/10919/field_highwire_adjunct_files/0/ELECTRONIC_SUPPLEMENT.pdf)
Supplement: ELECTRONIC_SUPPLEMENT.pdf [file ELECTRONIC_SUPPLEMENT.pdf]

## ELECTRONIC SUPPLEMENT

| <b>Table e1.</b> Participants' demographic characteristics and distribution per care settings. |              |              |
|------------------------------------------------------------------------------------------------|--------------|--------------|
|                                                                                                | S2           | S1           |
| Male sex, percent (mean age)                                                                   | 72% (52.2 y) | 69% (53.0 y) |
| Female sex, percent (mean age)                                                                 | 28% (45.1 y) | 31% (47.0 y) |
| Distribution per care settings                                                                 |              |              |
| Hospital, n (percent)                                                                          | 108 (65%)    | 349 (69%)    |
| Private practice, n (percent)                                                                  | 39 (23%)     | 116 (23%)    |
| Mixed practice, n (percent)                                                                    | 19 (11%)     | 44 (9 %)     |

## ELECTRONIC SUPPLEMENT (continued)

| <b>Table e2.</b> Number of IPF patients followed per type of physician practice. |    |           |                      |                   |                           |               |
|----------------------------------------------------------------------------------|----|-----------|----------------------|-------------------|---------------------------|---------------|
| Type of physician practice                                                       |    | RC/CC     | University hospitals | General hospitals | Private or mixed practice | All practices |
| Number of IPF patients currently followed                                        | S2 | 527 (28%) | 561 (29%)            | 326 (17%)         | 507 (26%)                 | 1921 (100%)   |
|                                                                                  | S1 | 556 (12%) | 1112 (24%)           | 1877 (40%)        | 1135 (24%)                | 4680 (100%)   |
| Mean number of IPF patients currently followed per centre                        | S2 | 53        | 33                   | 14                | 9                         | NA            |
|                                                                                  | S1 | 56        | 25                   | 8                 | 7                         | NA            |
| Proportion of IPF patients followed with mild to moderately severe disease       | S2 | 332 (63%) | 286 (51%)            | 170 (52%)         | 274 (54%)                 | 1062 (58%)*   |
|                                                                                  | S1 | 261 (47%) | 600 (54%)            | 1070 (57%)        | 726 (64%)                 | 2657 (58%)*   |
| Number of IPF patients seen per year                                             | S2 | 235       | 275                  | 166               | 212                       | NA            |
|                                                                                  | S1 | 286       | 454                  | 966               | 665                       | NA            |

|                                                                   |    |           |           |           |            |    |
|-------------------------------------------------------------------|----|-----------|-----------|-----------|------------|----|
| Mean number of IPF patients seen per year per centre              | S2 | 24        | 16        | 7         | 4          | NA |
|                                                                   | S1 | 28,6      | 10,6      | 7,5       | 4,2        | NA |
| Direct recruitment of patients with mild to moderate IPF per year | S2 | 65 (20%)  | 78 (27%)  | 205 (62%) | 324 (100%) | NA |
|                                                                   | S1 | 110 (42%) | 329 (55%) | 687 (64%) | 727 (100%) | NA |

Abbreviations: RC/CC, Reference Centre/Competence Centre; S1, first survey; S2, second survey; NA, non applicable.

Comments: Compared with S1, the mean number of IPF patients followed per centre was comparable in the RC/CC, but increased in all the other centres, being almost double than in S1 in the general hospitals. The global proportion of patients with mild-to-moderate IPF was 58% in both surveys. Considered per type of care setting, this proportion increased in the RC/CC, tended to remain stable in the university and general hospitals and tended to decrease in private or mixed practices. The proportion of patients with mild to moderate IPF that were directly recruited per year (seen for the first time by a pulmonologist) decreased by half in the RC/CC and in the university hospitals but remained unchanged in the general hospitals.

## **Electronic supplement**

### **Multidisciplinary discussion form**

- 1. French Version**
- 2. English Version**
